# Supplementary material for: Homozygous YME1L1 mutation causes mitochondriopathy with optic atrophy and mitochondrial network fragmentation
Source: eLife. 2016 Aug 6;5:e16078. doi: 10.7554/eLife.16078 (PMC4991934; doi:10.7554/eLife.16078)
Supplement: Figure 1—source data 1. — Raw values of YME1L1 mRNA expression in human adult fibroblasts of controls and patient measured via TaqMan qPCR (n=6). DOI: http://dx.doi.org/10.7554/eLife.16078.003 [file elife-16078-fig1-data1.xlsx]

## Sheet: Tabelle1
Replicate	Co 1			Co 2			p II.5
1	1.08754	0.934214	1.21808	0.727346	1.06327	2.3296	1.34775	1.09444	0.977344
2	0.83244	0.99206	0.944483	2.78858	0.997398	0.895877	1.16258	1.31213
3	1.05857	0.978644		0.538627	0.53628		0.794241	0.794706
4	0.651794	0.894289	0.716945	0.51705	0.598438		0.86074	0.962605
5	0.530983	0.539124	0.628666	0.459632	0.274143	0.472255	0.799054	1.62433
6	0.847214	1.09665		1.75572	1.75572		1.46188	1.81914
