# Supplementary material for: Homozygous YME1L1 mutation causes mitochondriopathy with optic atrophy and mitochondrial network fragmentation
Source: eLife. 2016 Aug 6;5:e16078. doi: 10.7554/eLife.16078 (PMC4991934; doi:10.7554/eLife.16078)
Supplement: Figure 4—source data 1. — Relative mitochondrial morphology quantification after immunocytochemistry with TOMM20 antibody and DAPI in human adult fibroblasts of control and patient (n=150–200 cells, 4 replicates). DOI: http://dx.doi.org/10.7554/eLife.16078.009 [file elife-16078-fig4-data1.xlsx]

## Sheet: Tabelle2
	tubular				borderline				fragmented
Co	75.14	80.43	83.83	91.08	23.73	19.57	16.17	8.55	1.13	0	0	0.37
pII.5	20.38	29.84	19.69	0	50.32	42.74	60.63	51.02	29.3	27.42	19.69	48.98
