# Supplementary material for: Homozygous YME1L1 mutation causes mitochondriopathy with optic atrophy and mitochondrial network fragmentation
Source: eLife. 2016 Aug 6;5:e16078. doi: 10.7554/eLife.16078 (PMC4991934; doi:10.7554/eLife.16078)
Supplement: Figure 4—source data 2. — Relative mitochondrial morphology quantification after immunocytochemistry with TOMM20 antibody and DAPI in WT and Yme1l1-/- adult cardiac murine fibroblasts overexpressing YME1L1 or YME1L1R149W (n=3). DOI: http://dx.doi.org/10.7554/eLife.16078.010 [file elife-16078-fig4-data2.xlsx]

## Sheet: Tabelle2
	WT			WT + hYME1L			WT + YME1L1R149W			Yme1l1 (-/-)			Yme1l1 (-/-) + YME1L1			Yme1l1 (-/-) + YME1L1R149W
Hyperfused	4.6	2.5	23.3	13	8	8	6	8	0	0	0	0.9	0	5	0	0	0	0
Tubular	83	73	88	87	59	73	82	67	73	9.6	5.6	5.5	65	60	73	20	19	16
Short Tubules	11.6	20	9.7	0	25	13	12	25	8	23	21.4	13.7	22	25	18	30	31	42
Fragmented	0.8	3.5	0	0	8	13	0	0	0	67.4	73	79.9	13	10	9	50	50	42
