# Supplementary material for: Homozygous YME1L1 mutation causes mitochondriopathy with optic atrophy and mitochondrial network fragmentation
Source: eLife. 2016 Aug 6;5:e16078. doi: 10.7554/eLife.16078 (PMC4991934; doi:10.7554/eLife.16078)
Supplement: Figure 5—source data 1. — Raw values of fluorometric measurement with Cell-titer Blue Cell Viability Assay application in human adult fibroblasts of controls and patient (n=5). DOI: http://dx.doi.org/10.7554/eLife.16078.016 [file elife-16078-fig5-data1.xlsx]

## Sheet: Tabelle2
Replicate	Co 1	Co 2	pII.5
1	66572	56530	26166
2	70558	49812	25019
3	67614	50758	22220
4	69886	53448	21427
5	62909	47794	12655
