# Supplementary material for: Homozygous YME1L1 mutation causes mitochondriopathy with optic atrophy and mitochondrial network fragmentation
Source: eLife. 2016 Aug 6;5:e16078. doi: 10.7554/eLife.16078 (PMC4991934; doi:10.7554/eLife.16078)
Supplement: Figure 5—source data 2. — Raw values of colorimetric measurement with BrdU Cell Proliferation ELISA Assay application in human adult fibroblasts of controls and patient (n=5). DOI: http://dx.doi.org/10.7554/eLife.16078.017 [file elife-16078-fig5-data2.xlsx]

## Sheet: Tabelle2
Replicate	Co 1	Co 2	pII.5
1	1.134	0.8	0.195
2	0.976	1.012	0.172
3	0.926	0.83	0.441
4	0.902	0.753	0.183
5	0.971	0.467	0.232
