# Supplementary material for: Homozygous YME1L1 mutation causes mitochondriopathy with optic atrophy and mitochondrial network fragmentation
Source: eLife. 2016 Aug 6;5:e16078. doi: 10.7554/eLife.16078 (PMC4991934; doi:10.7554/eLife.16078)
Supplement: Figure 5—source data 3. — Raw values of cleaved-PARP antibody signal intensity after staurosporine treatment in human adult fibroblasts of controls and patient and SDS-Page (n=3). DOI: http://dx.doi.org/10.7554/eLife.16078.018 [file elife-16078-fig5-data3.xlsx]

## Sheet: Tabelle2
hours of staurosporine incubation	Co1			Co2			p II.5
0	0	0	0	0	0	0	0	0	0
3	1.207	18.3741	0	1.56477	5.36435	5.76305	0	0	0
6	33.8034	46.7254	57.3681	35.5079	31.5323	45.1477	28.3549	27.6961	36.9563
